# Supplementary material
Source: publisher figshare collection journal article supplement (https://sage.figshare.com/ndownloader/files/14375951)
Supplement: Supplementary file 1 [file 14375951]

**Supplementary material**

**1. Client consent form**

**Owner Informed Consent Form**

***Title of clinical trial:***

A clinical trial to confirm the efficacy of the antiviral drug EVO984 (GS-551524) for the treatment of Feline Infectious Peritonitis (FIP).

***Investigator(s): Dr. Niels Pedersen, Dr. Elizabeth Montgomery, Michael Bannasch***

For questions or if there was a trial-related adverse event, please contact Dr. Niels Pedersen at [ncpedersen@ucdavis.edu](mailto:ncpedersen@ucdavis.edu) or at 530 752 7402

***Why is my cat being invited to take part in this clinical trial?***

We invite your cat to take part in this clinical trial because he/she has been diagnosed (confirmed or strongly suspected) with naturally acquired Feline Infectious Peritonitis (FIP) by your private veterinarian.

***What clinical forms of FIP are most likely to respond to treatment?***

Based on prior experience with a different antiviral drug, GC376 (KT147), we found that kittens <18 weeks of age with early onset effusive FIP in the chest or abdomen are most likely to go into a sustained disease remission after 12 weeks of treatment. We do not know if this will be true for EVO984. Cats with severe ocular or neurologic disease may not be good candidates because many drugs do not to cross from the bloodstream into the brain at sufficient levels.

***Why is this clinical trial being done?***

Feline Infectious Peritonitis (FIP) continues to be a progressive and invariably a fatal disease primarily of young cats and kittens. Recently, in small-scale experimental trials, a novel antiviral (EVO984) has been shown to be an effective treatment of this devastating disease under experimental conditions. Based on the success of these early trials, we are offering this treatment to a limited number of privately owned cats with naturally acquired FIP.

***If I choose to enroll my cat in this clinical trial, what will happen to my cat?***

If you agree to let your cat participate in this study, the following will happen when you come to UC Davis with your cat and all relevant veterinary records and test results:

**-** We will do a physical examination and collect approximately 1-2 ml of blood. If abdominal fluid is present in the cat’s abdomen or chest during the physical exam or ultrasound, a sample of this fluid will be taken as well. Blood and abdominal/chest fluid will be analyzed to help confirm an FIP diagnosis.

**-**Once a diagnosis of FIP is confirmed and you agree to participate in the study, your cat will be admitted to the hospital for treatment with antiviral EVO984 for a minimum of five days to evaluate the initial response to treatment. EVO984 will be administered once daily by the subcutaneous route. We anticipate that most admitted cats will respond to treatment during this period and will be released for home treatment. Hospitalization may be prolonged if deemed necessary. Additional blood samples (1-2 ml) will be taken at 48-72-hour intervals after hospitalization and prior to discharge. Samples (1-5ml) of abdominal or thoracic effusions, if present, will be taken at the time of entry and at 24-72-hour intervals during hospitalization to determine the effect of EVO984 on FIP virus levels.

**-** A follow up examination will be scheduled for 1-2 weeks after your cat has been discharge from the hospital and an additional blood sample (and fluid if still present) will be taken to assess progress

**-**Additional follow up exams at 3-4 weeks intervals during treatment and at 2-3-month intervals post treatment are required. Blood (1-2 ml) will be collected at each examination and a complete blood count (CBC) with serum proteins (globulin, albumin, A:G ratio) conducted.

***How will my cat receive treatments after being discharged from UC Davis and the first re-check examination?***

A three-week supply of EVO984 will be mailed overnight by FedEx at no cost to owners for as long as the cat is on treatment.

The owner(s) are responsible for either giving the daily injections or having them given by their private veterinarian or animal health technician. Owners usually chose to give these daily treatments because of cost and time required to have it done by others. We provide instructions to owners on drawing up medication and giving subcutaneous injections and virtually all previous clients have become very skilled at the procedure. Follow up examinations and blood testing after your cat is released from the VMTH can be conducted by your private veterinary veterinarian on an out-patient basis at your expense. The cost of hospitalization and treatment, or any ancillary veterinary care, given during this period will also be borne by you the owner.

***What is the duration of treatment?***

We will treat your cat for five days in the hospital, during which time we expect to see substantial signs of clinical improvement. If signs of improvement are not substantial, but are encouraging, hospitalization and treatment may be extended another five days. If the response to initial treatment is deemed adequate after 5 or 10 days your cat will be returned home to be treated for a total period up to 12 weeks. The exact duration will be based on response to treatment. You will be instructed when to stop treatment and monitoring. Disease relapses may occur within days or several weeks of discontinuing treatment. If relapses involve neurologic disease, further treatment may or may not be undertaken, and euthanasia recommended. If recurrent signs are of a type that may respond to additional treatment, treatment will be reinstituted. Failure to respond to additional bouts of drug therapy will be deemed treatment failures.

***What happens if my cat dies or must be euthanized during the study?***

The success of such a study requires that we know why a cat has failed treatment. This can be only done by a careful necropsy where tissues can be examined grossly and microscopically, and any remaining virus identified and studied for possible acquisition of drug resistance. Although a willingness to have a necropsy conducted is not mandatory, we expect owners to be prepared for such an eventuality and if they feel that this cannot be done, that they not participate in the study at the onset.

***What about cost?***

There is no charge for you to allow your cat to participate in this clinical trial. You will not be compensated for taking part in this study.

The following procedures will be covered by the sponsor/department during the 5 days or more of treatment and hospitalization and the first re-check.

- The cost of all appointments and physical exams.
- All blood work, diagnostic testing, and laboratory fees.
- The cost of treatment with antiviral (EVO984).
- Any medication necessary because of treatment or to address any pain or distress.
- All associated cat housing costs while at UC Davis.

Cats not responding to therapy or with disease progression during their 5 days of hospitalization will receive necessary supportive care at no charge; however, if the project veterinarians determine that your cat’s condition is deteriorating, this may warrant your cat’s removal from the study. Before removal from the study, a project veterinarian will notify you and advise that you either take their cat home or to transfer your cat to the VMTH for care, at which point you will assume financial responsible for the cost of further treatment. As FIP is a fatal disease, you will also be given to option of humane euthanasia of your cat. If your cat is euthanized at your request during the study, we will pay for shipment of the body to Davis and conduct a full necropsy at no cost. We will work with the owner on disposal of the body, i.e., cremation and no return of ashes (no cost), cremation and return of ashes (expense of owner), cosmetic necropsy with return of body (expense of owner).

The results of this study, including specimens collected, may have commercial value to the sponsors, the University of California Davis, and/or the researchers. You will have no legal or financial interest in any commercial development resulting from the research or from the information or materials collected.

***Could this trial hurt my cat?***

Daily injections of this type, regardless of the drug, can be painful and cats may become more resistant to treatment. EVO984 often causes a delayed burning reaction 30 second or so administration and may provoke a very brief period of vocalization. We have not observed any local reactions in the skin or under the skin from EVO984 over a two-week period, but we do advise that the injections be spread over the topline from the nape to the mid-back and on the upper sides of the chest and flanks. No other side effects directly resulting from this treatment were observed during the testing of the drug. However, cats with naturally acquired infection may respond differently to treatment.

Blood and fluid collections are brief and spaced out and generally cause less discomfort than the treatment injections. Failure of therapy with antiviral EVO984 will allow the disease to follow its natural course which in nearly all of cases results in slow or rapid disease progression and natural death or euthanasia.

***What happens if I decide not to enroll my cat in this clinical trial after being examined at the VMTH?***

Participation in this clinical trial is voluntary. If you decide not to participate in the study, your choice will not affect your cat’s future medical care.

***What happens if I choose to enroll my cat, but I change my mind later?***

Throughout the study, we will keep you informed about any significant new findings that may affect your willingness to continue to allow your cat to participate in the study. You can remove your cat from the study at any time and it will not be affect the medical care of your cat. Please note that we will not remove any data from the trial database that has already been collected if you choose to remove your cat from the study. Data collected up until the time you remove your cat from the study will be held for possibly inclusion in the final study results.

***Will being in this trial help my cat or other cats in any way?***

We cannot promise any benefits to your cat or other animals from your taking part in this clinical trial; however, possible benefits include remission and possibly resolution of your cat’s FIP condition.

***What happens to the information collected for the clinical trial?***

All client and animal details and information obtained from the study will be considered confidential and will be used for research purposes. We will limit the use and/or disclosure of your information or that of your cat to people who have a need to review this information.

If specimens, such as blood or tissue, are taken from your cat for this study, they will become the property of the University of California. The specimens may be used in research and may be shared with other organizations. The specimens could lead to discoveries or inventions that may be of value to the University of California or to other organizations. Under state law, you do not have any right to money or other compensation stemming from products that may be developed from the specimens.

If you agree to share the biological specimen(s) collected from your cat, please initial here.

Otherwise, your specimen will be destroyed at the end of this study.

We may publish the results of this research. However, we will keep any identifying information of the owner confidential.

***Can I be removed from the research without my OK?***

Your cat may be removed from the study without your request if:

1. We believe it is in your cat’s best interest
2. The trial is discontinued
3. We believe the trial protocol is not being followed

***Who can I talk to if I have questions?***

If you have questions, concerns, complaints, or think the study has negatively affected your cat, please contact the investigator. This research has been reviewed and approved by the Institutional Animal Care and Use Committee (IACUC) and the Clinical Trials Review Board (CTRB). You may talk to 530-752-2364 or [iacuc-staff@ucdavis.edu](mailto:iacuc-staff@ucdavis.edu) if you cannot reach the investigator.

By signing below, I agree to permit my cat _______________ (insert name) to participate in this clinical study and undergo the procedures described to me above.

By signing below, I understand the statements in this informed consent document and that a signed and dated copy of the consent form will be given to me.

*__________________________________* ______________

Signature of Owner Date

__________________________________

Printed Signature of Owner
